# Supplementary material for: The yeast p24 complex regulates GPI-anchored protein transport and quality control by monitoring anchor remodeling
Source: PubMed Central journal article supplement — Mol Biol Cell. 2011 Aug 15;22(16):2924–36. doi: 10.1091/mbc.E11-04-0294 (PMC3154887; doi:10.1091/mbc.e11-04-0294), 2011-08-15
Supplement: E11-04-0294_1.pdf [file E11-04-0294_1.pdf]

## Supplemental figures legends

**Figure S1. The p24 complex is required for efficient ER exit of GPI-anchored proteins.** Pulse-chase analysis of the ER-to-Golgi transport in wild-type and *emp24Δ* strains. Cells were radiolabeled for 5 min, chased for 15 min at 24°C, and lysed. GPI-anchored proteins, CPY and Pre-pro- $\alpha$ -factor were immunoprecipitated, resolved by SDS-PAGE, and analyzed by PhosphoImager. GPI-anchored proteins: p, ER-precursor form; m, Golgi form. CPY: p1, ER-precursor form; p2, Golgi precursor form; m, mature form. Pre-pro- $\alpha$ -factor: p, ER-precursor form. GPI-APs: GPI-anchored proteins.

**Figure S2. ERES formation is not influenced by *erv14Δ* and *emp24Δ* mutations.** Fluorescent micrographs of live wild-type, *erv14Δ*, *emp24Δ*, *sec31-1*, *sec31-1 erv14Δ* and *sec31-1 emp24Δ* cells expressing Sec13-GFP at 37°C. Raw images. Scale bar: 5  $\mu$ m.

**Figure S3. The p24 complex is not required for protein sorting upon ER exit.** (A) Fluorescent micrographs of live *sec31-1* and *sec31-1 emp24Δ* cells expressing Hxt1-CFP (cyan) and Cwp2-Venus (yellow) at 37°C. (B) Quantification of several micrographs described in (A). The graph displays the means of the percentage of co-localization per cell between Cwp2-Venus dots and Hxt1-CFP dots in *sec31-1* (n=47), and in *sec31-1 emp24Δ* (n=58). Images deconvoluted by 10 iterations. Open arrow heads: non co-localizing dots. Scale bar: 5  $\mu$ m.

**Figure S4. Emp24p is present in GPI-anchored protein containing ERES.** (A) Live images of *sec31-1* ERV14-mCi (yellow) cells expressing CFP-Hxt1p (blue) at 37°C. (B) Quantification of several micrographs described in (A). (B) In the left panel, the number of dots of Erv14-mCi and CFP-Hxt1p per cell was averaged. In the right panel, the graph plots the quantification of the co-localization between Erv14-mCi and CFP-Hxt1p dots. (n=52). (C) Live images of *sec31-1* cells expressing Emp24-CFP (blue) and Ccw14-Venus (yellow) at 37°C. (D) Quantification of several micrographs described in (C). (D) In the left panel, the number of dots of Emp24-CFP and Ccw14-Venus per cell was averaged. In the right panel, the graph plots the quantification of the co-localization between Emp24-CFP and Ccw14-Venus dots. (n=72). (A,C) Scale bar: 5  $\mu$ m. White arrow heads: co-localizing dots. The images were deconvoluted by 10 iterations.

**Figure S5. Native co-immunoprecipitation assay between Emp24p and Gas1p in *per1Δ* and *gup1Δ* remodeling mutant strains.** Wild type, *per1Δ*, *gup1Δ* and *emp24Δ* mutant cells expressing Gas1-HA were solubilized in 1% digitonin and analyzed by native immunoprecipitation (IP) with anti-Emp24p antibody followed by immunoblotting with anti-HA peroxidase antibody. Totals (T) represent a fraction of the solubilized input material.

**Figure S6. Functional fluorescent fusion of Erv14p and Emp24p.** (A) Fluorescent micrographs of live wild-type, *erv14Δ* and ERV14-mCi cells expressing CFP-Hxt1p at 30°C. (B) Fluorescent micrographs of live wild-type cells, *emp24Δ* cells transformed with YCplac111 and *emp24Δ* cells transformed with YCplac111-Emp24-CFP expressing Cwp2-Venus at 30°C. (A,B) Raw images. The white arrow points out ER localization of cargoes. Scale bar: 5  $\mu$ m.

**Figure S7. The p24 complex is stable in remodeling mutants.** (A) Co-immunoprecipitation of Emp24-CFP with Erp2p in wild-type, *erv25Δ* and *bst1Δ* cells. Lysates (L) were incubated with the monoclonal anti-GFP antibody. (B) Stability of Emp24p after cycloheximide treatment in wild-type, *erv25Δ*, *bst1Δ* and *per1Δ* cells at 30°C. (C) Protein levels of Emp24p and Erv25p in the remodeling mutants at 37°C.

**Figure S8. Co-localization of a GPI-anchored protein with a vacuolar marker in wild type and mutant strains.** Live images of wild-type, *ret1-1*, *bst1Δ* and *ret1-1 bst1Δ* expressing Ccw14-Venus at 24°C. The dye CellTracker blue-CMAC was added to cultures to allow visualization of the vacuole. Raw images. Scale bar: 5 μm.

**Fig. S1**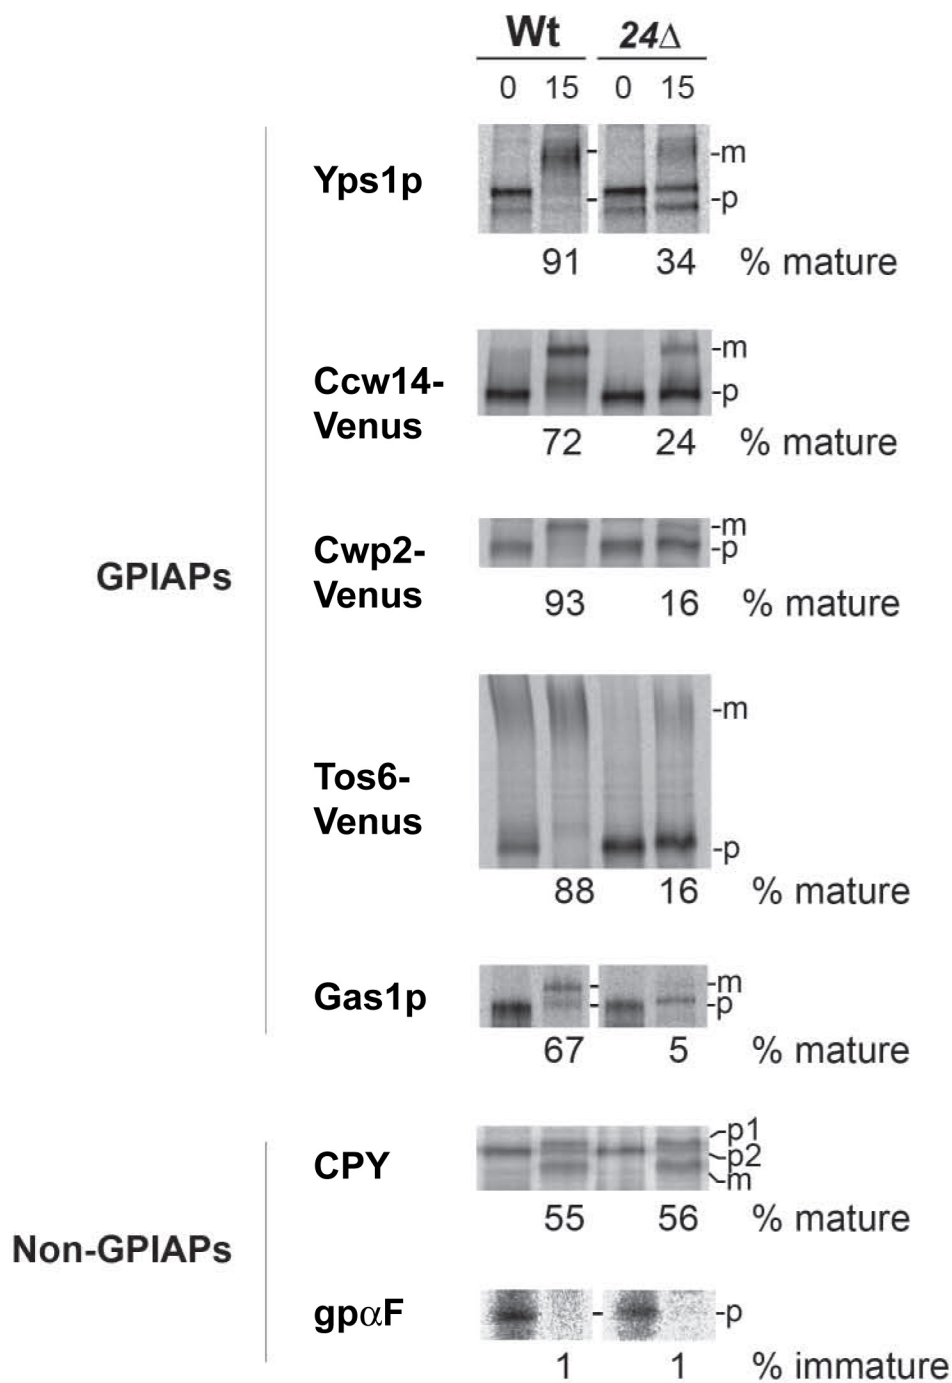

**Fig. S2**

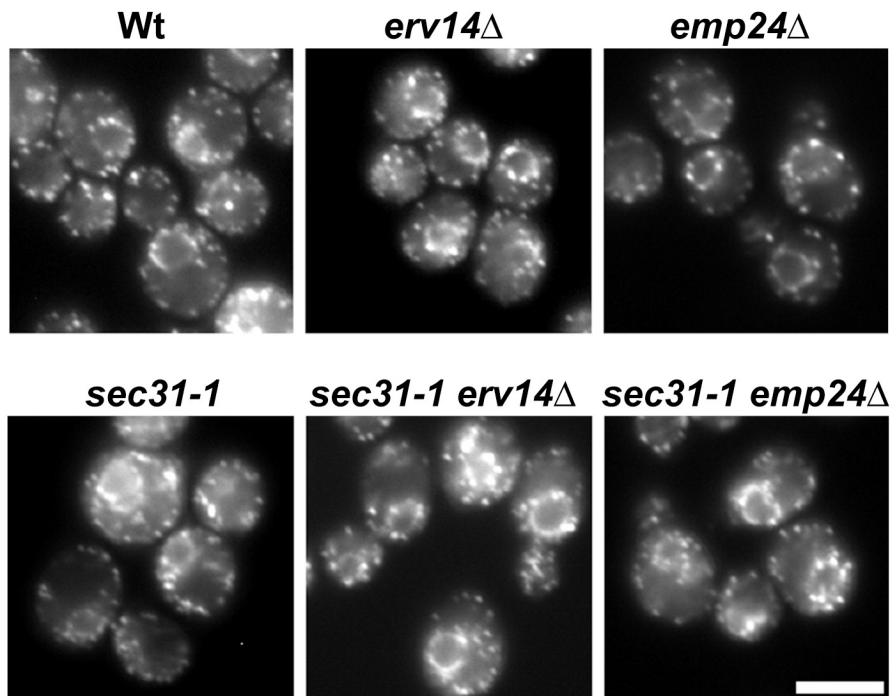

**Fig. S3**

**A**

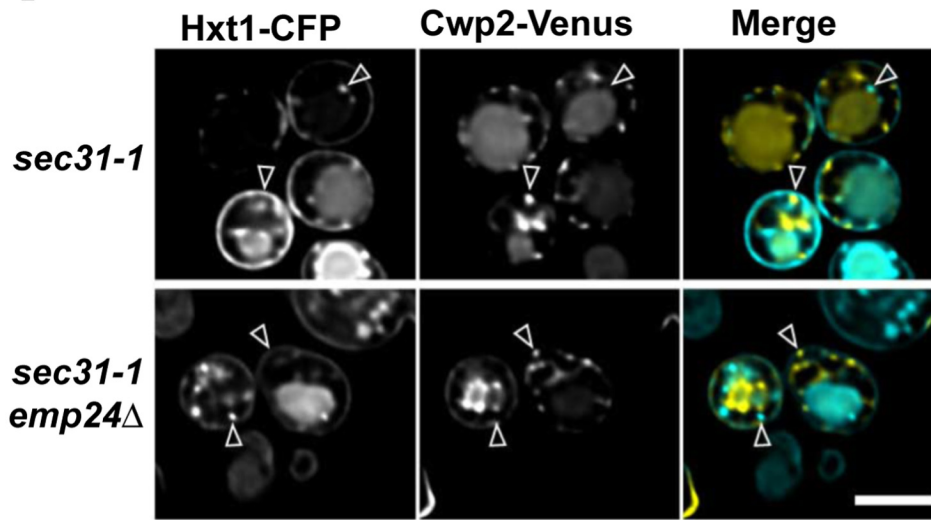

**B**

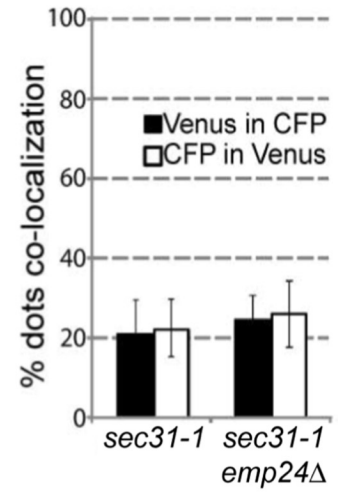

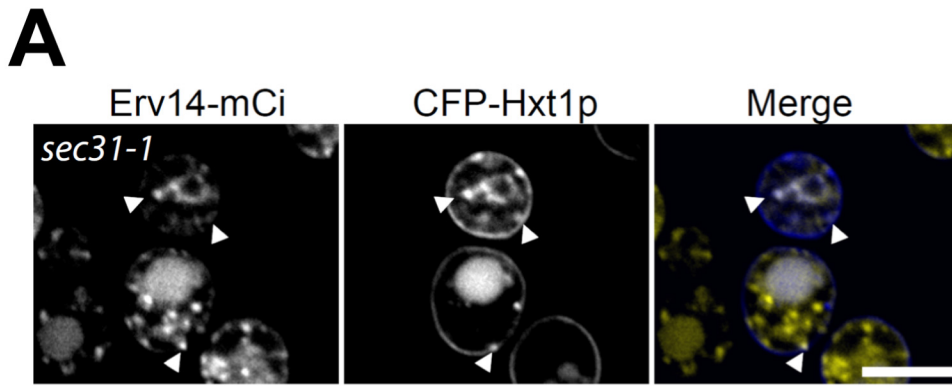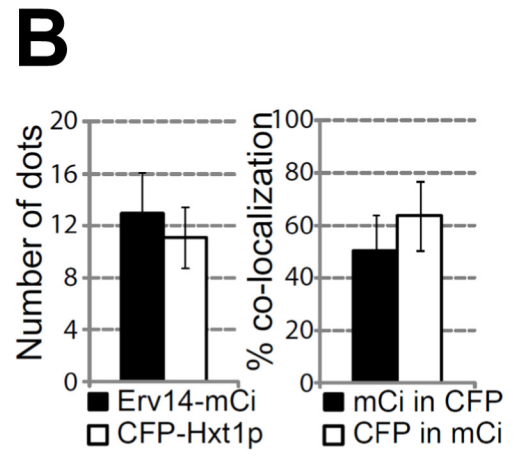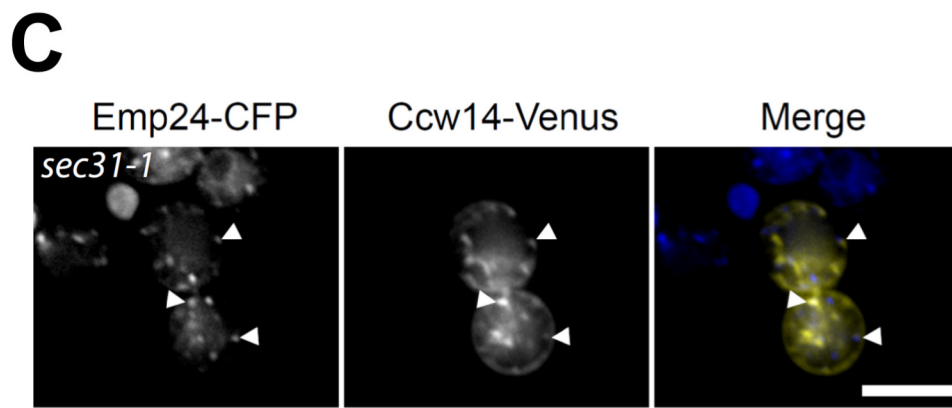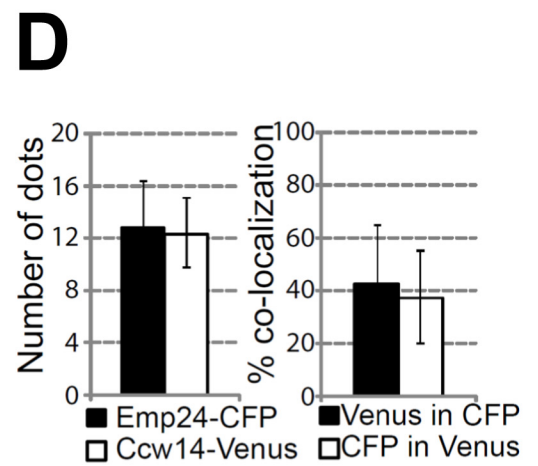

## Co-immunoprecipitation

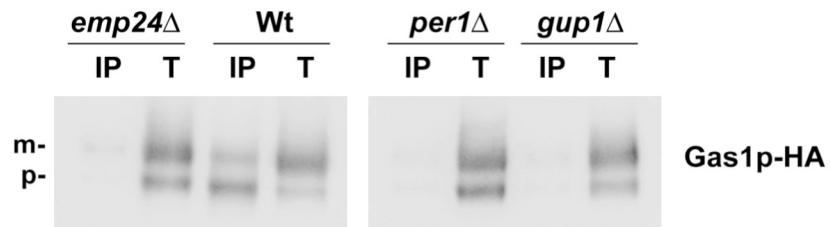

**A**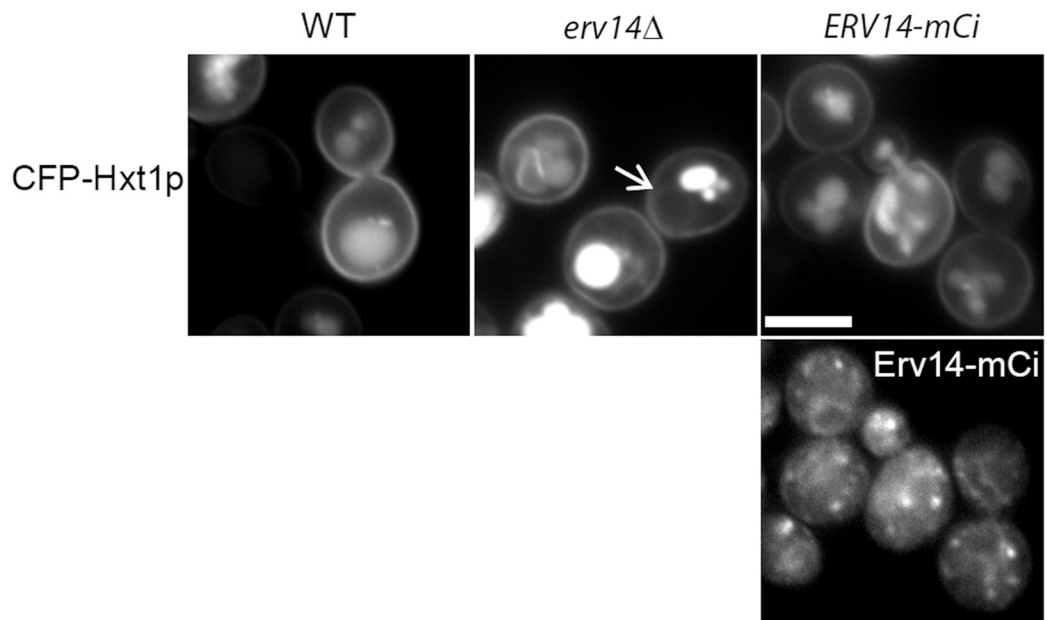**B**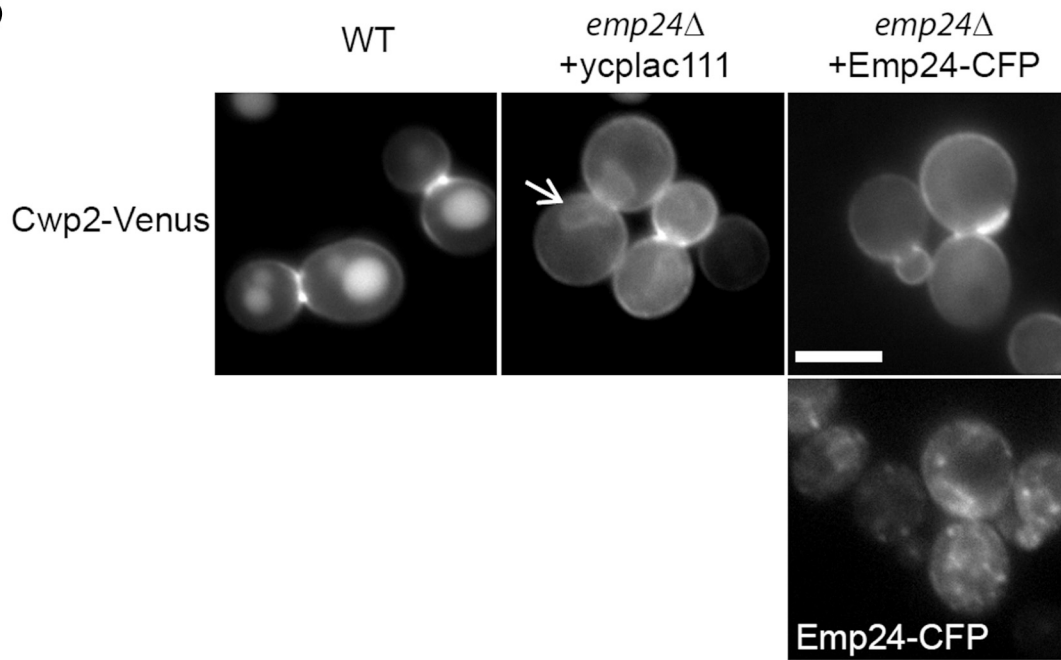



## A

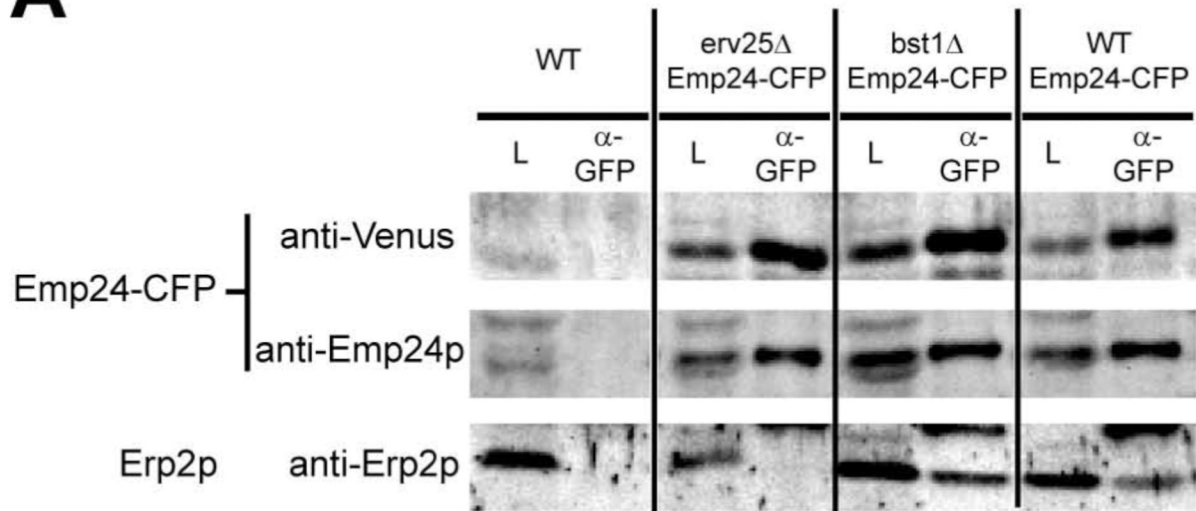

## B

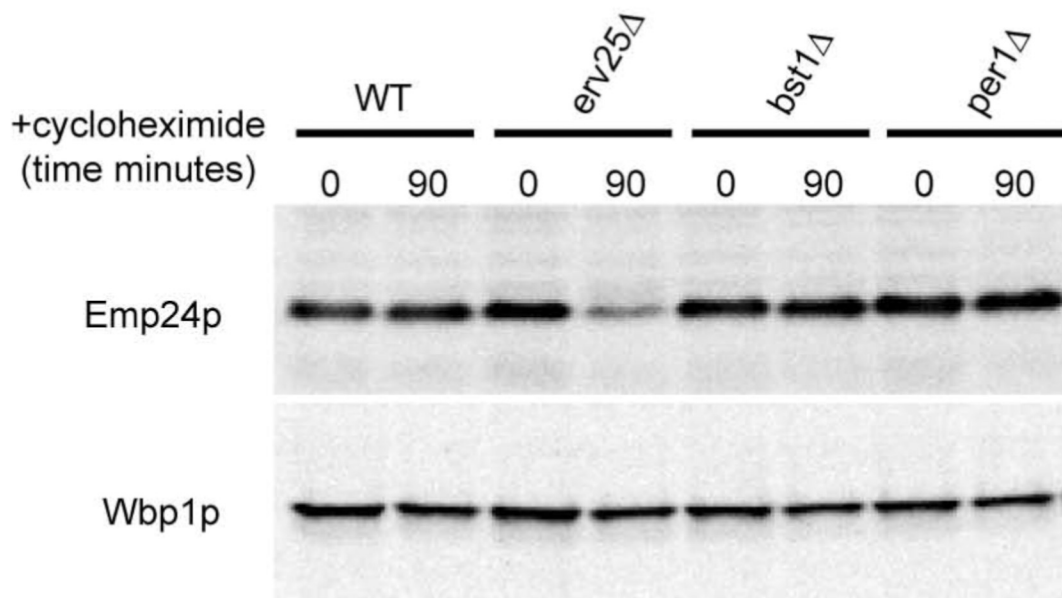

## C

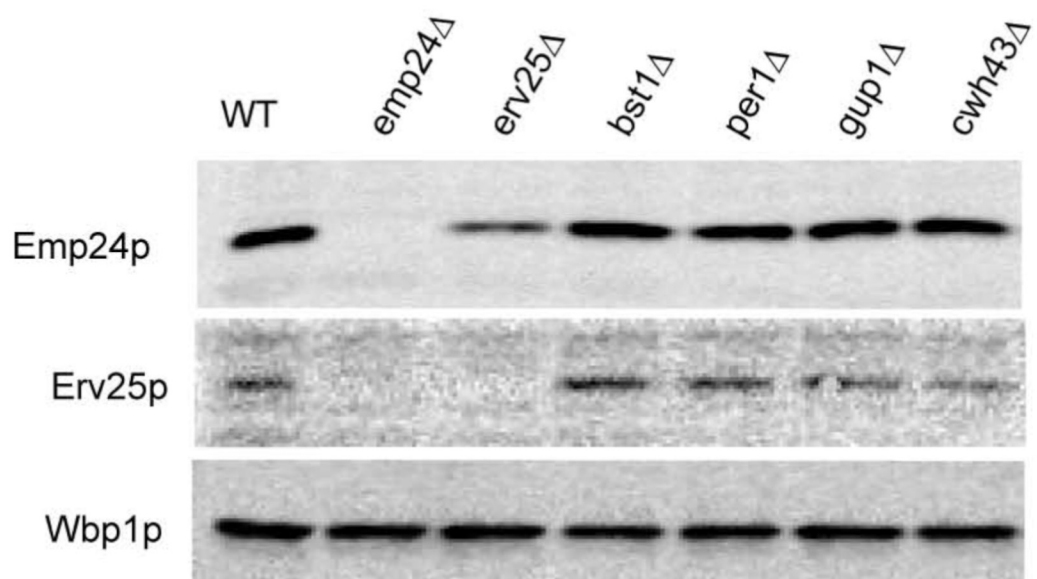

**Fig. S8**

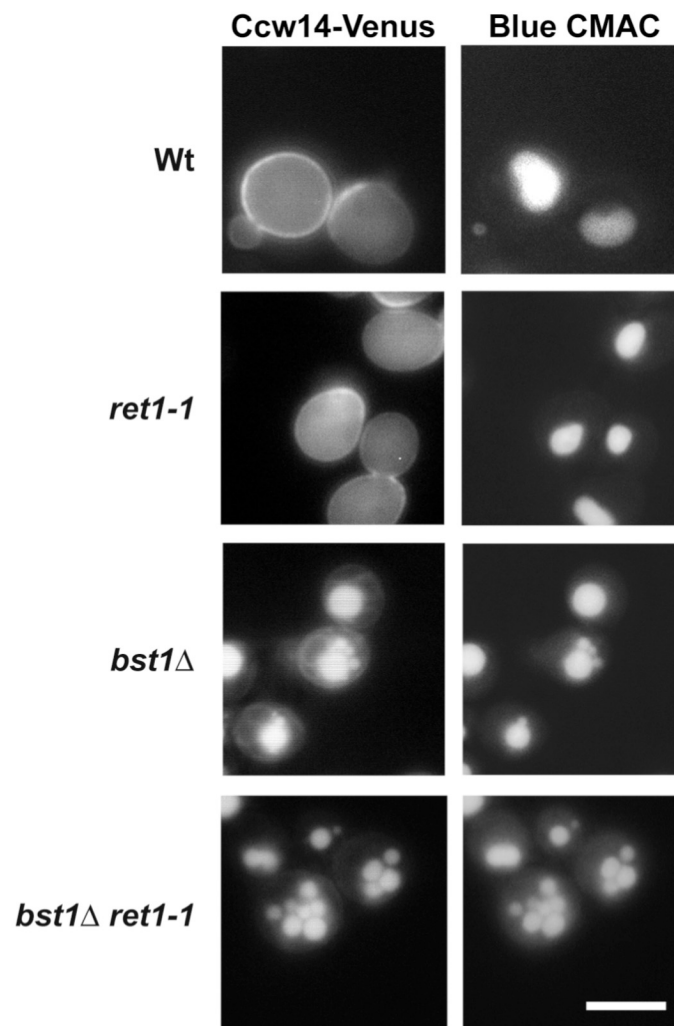

**Table S1.** List of the strains used in this study.

| <i>Number</i> | <i>Name</i>              | <i>Genotype</i>                                                  |
|---------------|--------------------------|------------------------------------------------------------------|
| RH2874        | <i>WT</i>                | <i>Mat a leu2 lys2 trp1 ura3 bar1</i>                            |
| RH6153        | <i>erv29Δ</i>            | <i>Mat a erv29Δ::KanMX ura3 leu2 lys2 trp1 bar1</i>              |
| RH5698        | <i>gpi1Δ</i>             | <i>Mat a gpi1::TRP1 ade2 ade3 his3 leu2 trp1 ura3</i>            |
| RH5877        | <i>sec31-1</i>           | <i>Mat a sec31-1 leu2 ura3 lys2 trp1 his3</i>                    |
| RH6910        | <i>emp24Δ</i>            | <i>Mat a emp24Δ::KanMX leu2 ura3 lys2 trp1 his3</i>              |
| RH6912        | <i>sec31-1 emp24Δ</i>    | <i>Mat a sec31-1 emp24Δ::KanMX leu2 ura3 lys2 trp1</i>           |
| RH6878        | <i>erv14Δ</i>            | <i>Mat a erv14Δ::KanMX leu2 ura3 lys2 trp1</i>                   |
| RH6881        | <i>sec31-1 erv14Δ</i>    | <i>Mat a sec31-1 erv14Δ::KanMX leu2 ura3 lys2 trp1</i>           |
| RH7016        | <i>erv14-mCi</i>         | <i>Mat a erv14-mCi-SpHIS5 leu2 ura3 lys2 trp1 his3</i>           |
| RH7017        | <i>sec31-1 erv14-mCi</i> | <i>Mat a sec31-1 erv14-mCi-SpHIS5 leu2 ura3 lys2 trp1 his3</i>   |
| RH7021        | <i>WT</i>                | <i>Mat a leu2 ura3 met15 his3</i>                                |
| RH7022        | <i>emp24Δ</i>            | <i>Mat a emp24Δ::KanMX leu2 ura3 met15 his3</i>                  |
| RH7023        | <i>erv25Δ</i>            | <i>Mat a erv25Δ::KanMX leu2 ura3 met15 his3</i>                  |
| RH7025        | <i>bst1Δ</i>             | <i>Mat a bst1Δ::KanMX leu2 ura3 met15 his3</i>                   |
| RH7026        | <i>per1Δ</i>             | <i>Mat a per1Δ::KanMX leu2 ura3 met15 his3</i>                   |
| RH7085        | <i>bst1Δ emp24Δ</i>      | <i>Mat a bst1Δ::KanMX emp24Δ::KanMX ura3 leu2 lys2 trp1 his3</i> |
| RH7096        | <i>bst1Δ</i>             | <i>Mat a bst1Δ::KanMX ura3 leu2 lys2 trp1 his3</i>               |
| RH7097        | <i>sec31-1 bst1Δ</i>     | <i>Mat a sec31-1 bst1Δ::KanMX ura3 leu2</i>                      |
| MMY596        | <i>per1Δ</i>             | <i>Mat a per1Δ::KanMX ura3 leu2 his4 trp1 ade2</i>               |
| MMY756        | <i>emp24 3xHA</i>        | <i>Mat a emp24 3xHA::KanMX ura3 leu2 his3</i>                    |
| MMY631        | <i>emp24 3xHA</i>        | <i>Mat a emp24 3xHA::KanMX ura3 leu2 his3 lys2</i>               |
| BY4742        | <i>gas1Δ</i>             | <i>Mat a gas1Δ::KanMX ura3 leu2 his3 lys2</i>                    |
| MMY664        | <i>emp24 3xHA gas1Δ</i>  | <i>Mat a emp24-3xHA::KanMX gas1Δ::KanMX ura3 leu2 his3 lys2</i>  |
| RH2863        | <i>ret1-1</i>            | <i>Mat a ret1-1 ura3 leu2 his4 lys2 trp1</i>                     |
| MMY946        | <i>ret1-1 bst1Δ</i>      | <i>Mat a ret1-1 bst1Δ ura3 leu2 his3 lys2 ade2 trp1</i>          |
| RSY1800*      | <i>lst1Δ</i>             | <i>Mat a lst1::HIS3 ura3 leu2 his3 lys2 ade2 trp1</i>            |
| MMY982        | <i>gas1 3xHA emp24Δ</i>  | <i>Mat a gas1 3xHA::URA3 emp24Δ::KanMX leu2 his3 trp1 ade2</i>   |
| VGY1202‡      | <i>gas1 3xHA</i>         | <i>Mat a gas1 3xHA::URA3 leu2 his3 trp1 ade2 can1</i>            |
| MMY848        | <i>gas1 3xHA bst1Δ</i>   | <i>Mat a gas1 3xHA::URA3 bst1Δ::KanMX leu2 his3 trp1</i>         |
| MMY850        | <i>gas1 3xHA per1Δ</i>   | <i>Mat a gas1 3xHA::URA3 per1Δ::KanMX leu2 his3 trp1 ade2</i>    |
| MMY852        | <i>gas1 3xHA gup1Δ</i>   | <i>Mat a gas1 3xHA::URA3 gup1Δ::KanMX leu2 his3</i>              |

\*Randy Schekman yeast collection, ‡Veit Goder yeast collection
